# Supplementary material
Source: PubMed Central journal article supplement (PMC7783331)
Supplement: AEM.02052-20-s0001.pdf [file AEM.02052-20-s0001.pdf]

1           **Regulator RcsB Controls Prodigiosin Synthesis and Various**  
2                           **Cellular Processes in *Serratia marcescens* JNB5-1**

3           Xuewei Pan<sup>a</sup>, Mi Tang<sup>a</sup>, Jiajia You<sup>a</sup>, Fei Liu<sup>a</sup>, Changhao Sun<sup>a</sup>, Tolbert Osire<sup>a</sup>, Weilai  
4                   Fu<sup>a, b</sup>, Ganfeng Yi<sup>b</sup>, Taowei Yang<sup>a#</sup>, Shang-Tian Yang<sup>c</sup>, Zhiming Rao<sup>a#</sup>

5           <sup>a</sup>Key Laboratory of Industrial Biotechnology of the Ministry of Education, Laboratory  
6           of Applied Microorganisms and Metabolic Engineering, School of Biotechnology,  
7           Jiangnan University, Wuxi 214122, China.

8           <sup>b</sup>Fujian Dabeinong Aquatic Sci. & Tech. Co., Ltd., Zhangzhou 363500, China.

9           <sup>c</sup>Department of Chemical and Biomolecular Engineering, The Ohio State University,  
10           Columbus, OH, 43210, USA.

11  
12  
13  
14           # Corresponding author: Taowei Yang, E-mail: [yangtw@jiangnan.edu.cn](mailto:yangtw@jiangnan.edu.cn); Zhiming Rao,  
15           E-mail: [raozhm@jiangnan.edu.cn](mailto:raozhm@jiangnan.edu.cn), Tel: 86-510-85916881.

23 **Fig. S1**

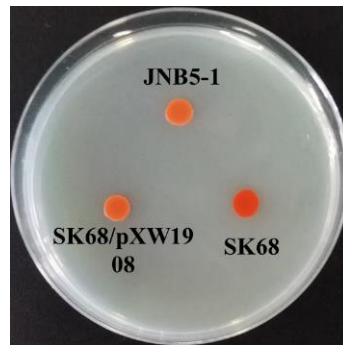

24

25 **Figure S1. Spot assays on agar plate showed that RcsB was negatively regulates**  
26 **prodigiosin synthesis in *S. marcescens*.** JNB5-1 is a wild-type *S. marcescens*, SK68  
27 is a *rcsB* disrupted mutant, and SK68/pXW1908 is a *rcsB* complementary strain with  
28 plasmid pXW1908.

29

30

31

32

33

34

35

36

37

38

39

40

41

42 **Fig. S2**

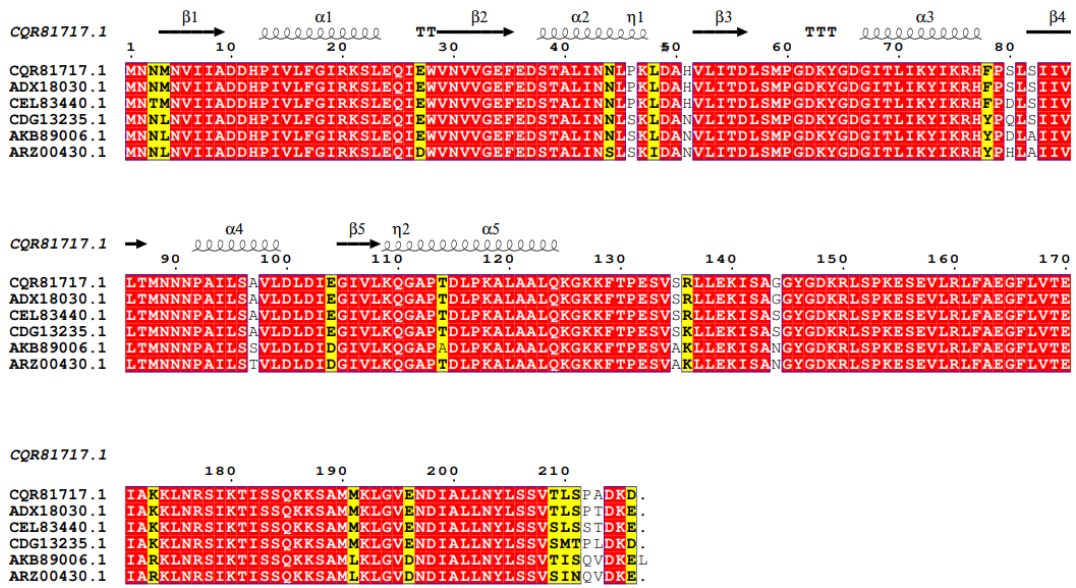

43

44 **Figure S2. Multiple sequence alignment of RcsB homologies.** The sequences used  
 45 for analysis were RcsB homologies from *Serratia marcescens* (CDG13235.1),  
 46 *Escherichia coli* (CQR81717.1), *Klebsiella pneumoniae* (CEL83440.1), *Salmonella*  
 47 *enterica subsp. enterica serovar Typhimurium* (ADX18030.1), *Yersinia pestis*  
 48 (*AKB89006.1*) and *Yersinia ruckeri* (*ARZ00430.1*).

49

50

51

52

53

54

55

56

57

58 **Fig. S3**

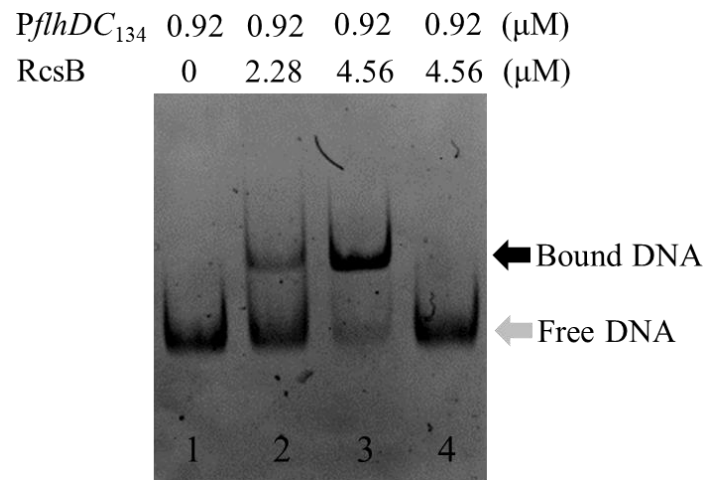

60 **Figure S3. EMSA results revealed that RcsB could specifically bind to the binding**  
61 **site RcsB-2 *in vitro*.** *PflhDC*<sub>134</sub>, 134-bp DNA fragment from -532 to -666 relative to  
62 the translational start site of *flhD* gene. Lane 1: *PflhDC*<sub>134</sub> without protein RcsB. Lane  
63 2: *PflhDC*<sub>134</sub> with 2.28  $\mu$ M RcsB. Lane 3: *PflhDC*<sub>134</sub> with 4.56  $\mu$ M RcsB. Lane 4:  
64 *PflhDC*<sub>134</sub> carrying mutation in positions TTA with protein RcsB.

65

66

67

68

69

70

71

72

73

74

75 **Fig. S4**

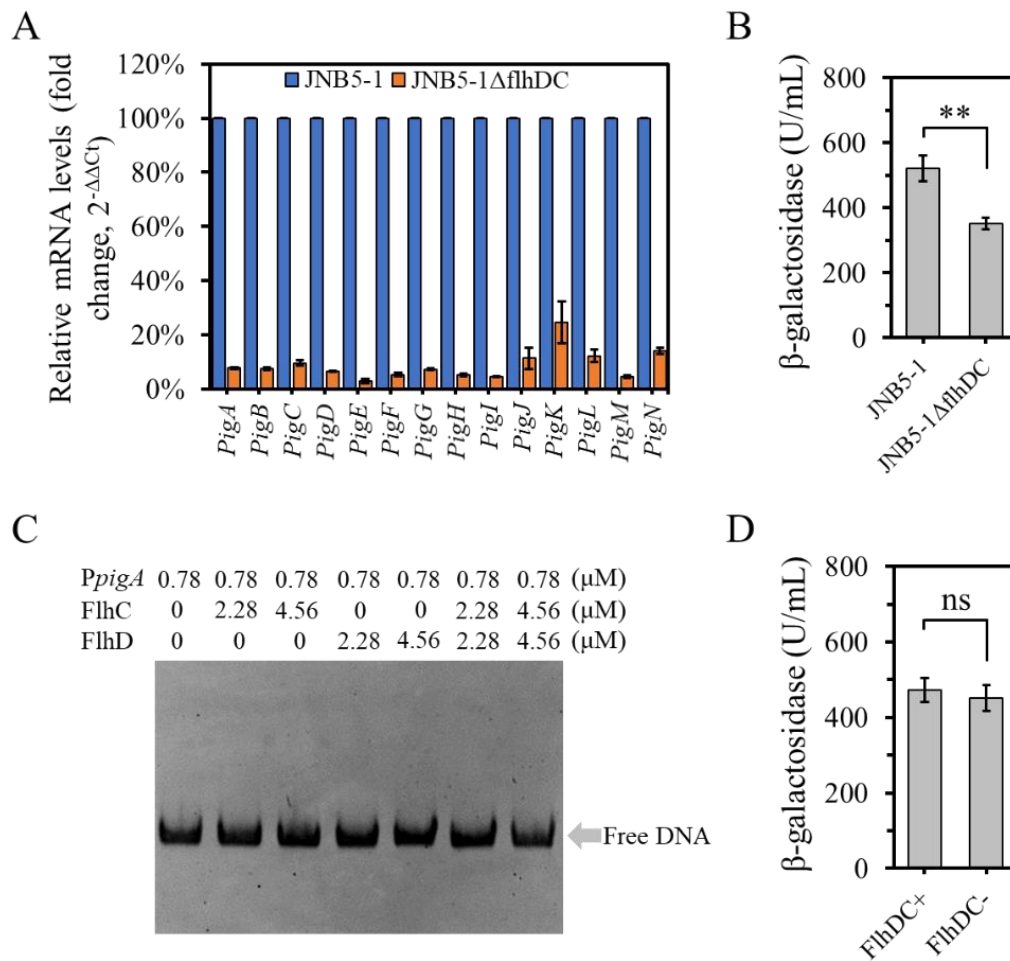

76

77 **Figure S4. FlhDC regulates the prodigiosin synthesis genes indirectly.** A. RT-qPCR

78 analysis the *pig* gene cluster expression level in the strains JNB5-1 and JNB5-1ΔflhDC

79 at an OD<sub>600</sub> of 6.0. B. Analysis of β-galactosidase activity of strains JNB5-1 and JNB5-

80 1ΔflhDC harboring the *PpigA-lacZ* reporter fusion at an OD<sub>600</sub> of 5.0. C. EMSA for

81 FlhD protein or FlhC protein or FlhDC proteins binding to the promoter region of the

82 *pig* operon. D. Overexpression of FlhDC proteins has no significant effect on the

83 expression of the *pig* gene cluster in *E. coli*. The transcription fusions *PpigA-lacZ* was

84 used in the *E. coli* strains DH5α/pXW2005/pDN19lacΩ-*PpigA* (FlhDC+) and

85 DH5α/pUCP18/pDN19lacΩ-*PpigA* (FlhDC-). The plasmid pXW2005 carries the intact

86 *flhD* and *flhC* genes. The samples were collected at an OD<sub>600</sub> of 4.0. For B and C, the

87 experiments were performed in biological triplicates. Error bars indicate the standard  
88 deviations. For B and D, student's t-test was used for statistical analysis. \*\*,  $P < 0.01$ ;  
89 ns, no significance difference.

90 **Table S1. Primers used for characterize the target site of RcsB protein within the *flhDC* promoter region in this study**

| Primer                                                                           | Primer sequence (5'-3')                                    | Function                                                                                                                    |
|----------------------------------------------------------------------------------|------------------------------------------------------------|-----------------------------------------------------------------------------------------------------------------------------|
| FlhDC <sub>288</sub> -F                                                          | GGCAAATTAATCTCTCAAAAACGACTGC                               | Amplification of the DNA fragment FlhDC <sub>288</sub> which containing the predicted RcsB binding site RcsB-1              |
| FlhDC <sub>288</sub> -R                                                          | GGGTGTATTTGGCTTAATTATTTTTATTTTTGTGATCTATG                  |                                                                                                                             |
| FlhDC <sub>134</sub> -F                                                          | GGCAACAAACTCAGTATAAATAACCATTTGAGTTAC                       | Amplification of the DNA fragment FlhDC <sub>134</sub> which containing the predicted RcsB binding site RcsB-2              |
| FlhDC <sub>134</sub> -R                                                          | GAAAATTAGAACAGCCTCAGGCGG                                   |                                                                                                                             |
| FlhDC <sub>288</sub> (C <sup>-245</sup> C <sup>-246</sup> C <sup>-247</sup> )-F1 | GGCAAATTAATCTCTCAAAAACGACTGC                               | Amplification of mutated DNA fragment <i>PflhDC</i> <sub>288</sub> (C <sup>-245</sup> C <sup>-246</sup> C <sup>-247</sup> ) |
| FlhDC <sub>288</sub> (C <sup>-245</sup> C <sup>-246</sup> C <sup>-247</sup> )-R1 | <u>GGGT</u> TAAATTTGTAAAAATAGTTTCATGGTGACTAAACACTATCGAA    |                                                                                                                             |
| FlhDC <sub>288</sub> (C <sup>-245</sup> C <sup>-246</sup> C <sup>-247</sup> )-F2 | TATTTTTACAAATTTA <u>ACCCG</u> ATTATTCCTAAAGCAGCGCAACTCTACC |                                                                                                                             |
| FlhDC <sub>288</sub> (C <sup>-245</sup> C <sup>-246</sup> C <sup>-247</sup> )-R2 | GGGTGTATTTGGCTTAATTATTTTTATTTTTGTGATCTATG                  |                                                                                                                             |
| FlhDC <sub>288</sub> (A <sup>-254</sup> A <sup>-255</sup> A <sup>-256</sup> )-F1 | GGCAAATTAATCTCTCAAAAACGACTGC                               | Amplification of mutated DNA fragment <i>PflhDC</i> <sub>288</sub> (A <sup>-254</sup> A <sup>-255</sup> A <sup>-256</sup> ) |
| FlhDC <sub>288</sub> (A <sup>-254</sup> A <sup>-255</sup> A <sup>-256</sup> )-R1 | <u>TTTATA</u> AATCTTATTAATTTGTAAAAATAGTTTCATGGTGACTAAACAC  |                                                                                                                             |
| FlhDC <sub>288</sub> (A <sup>-254</sup> A <sup>-255</sup> A <sup>-256</sup> )-F2 | AAATTTAATAAGATTATA <u>AAA</u> TAAAGCAGCGCAACTCTACCCC       |                                                                                                                             |
| FlhDC <sub>288</sub> (A <sup>-254</sup> A <sup>-255</sup> A <sup>-256</sup> )-R2 | GGGTGTATTTGGCTTAATTATTTTTATTTTTGTGATCTATG                  |                                                                                                                             |
| FlhDC <sub>288</sub> (RcsB-1)-F1                                                 | GGCAAATTAATCTCTCAAAAACGACTGC                               | Amplification of mutated DNA fragment <i>PflhDC</i> <sub>288</sub> (RcsB-1)                                                 |
| FlhDC <sub>288</sub> (RcsB-1)-R1                                                 | TTAAATTTGTAAAAATAGTTTCATGGTGACTAAACACTATCG                 |                                                                                                                             |
| FlhDC <sub>288</sub> (RcsB-1)-F2                                                 | AACTATTTTTACAAATTTAAAAGCAGCGCAACTCTACCCC                   |                                                                                                                             |
| FlhDC <sub>288</sub> (RcsB-1)-R2                                                 | GGGTGTATTTGGCTTAATTATTTTTATTTTTGTGATCTATG                  |                                                                                                                             |
| FlhDC <sub>134</sub> (C <sup>-634</sup> C <sup>-635</sup> C <sup>-636</sup> )-F1 | GGCAACAAACTCAGTATAAATAACCATTTGAGTTAC                       | Amplification of mutated DNA fragment <i>PflhDC</i> <sub>134</sub> (C <sup>-634</sup> C <sup>-635</sup> C <sup>-636</sup> ) |
| FlhDC <sub>134</sub> (C <sup>-634</sup> C <sup>-635</sup> C <sup>-636</sup> )-R1 | <u>GGGGT</u> CAAATCCGATAGCTAATAACCTTATAGTTTAC              |                                                                                                                             |

|                                                                                  |                                                             |                                                                                                                             |
|----------------------------------------------------------------------------------|-------------------------------------------------------------|-----------------------------------------------------------------------------------------------------------------------------|
| FlhDC <sub>134</sub> (C <sup>-634</sup> C <sup>-635</sup> C <sup>-636</sup> )-F2 | TAGCTATCGGATTTGACCCCAGCCCTCCGCCTGAGGCTGTT                   |                                                                                                                             |
| FlhDC <sub>134</sub> (C <sup>-634</sup> C <sup>-635</sup> C <sup>-636</sup> )-R2 | GAAAATTAGAACAGCCTCAGGCGG                                    |                                                                                                                             |
| FlhDC <sub>581</sub> -F                                                          | GGCAAATTAATCTCTCAAAAACGACTGC                                | Amplification of the DNA fragment FlhDC <sub>581</sub> which containing the predicted RcsB binding site RcsB-1 and RcsB-2   |
| FlhDC <sub>581</sub> -R                                                          | GAAAATTAGAACAGCCTCAGGCGG                                    |                                                                                                                             |
| FlhDC <sub>581</sub> (C <sup>-245</sup> C <sup>-246</sup> C <sup>-247</sup> )-F1 | GGCAAATTAATCTCTCAAAAACGACTGC                                | Amplification of mutated DNA fragment <i>PflhDC</i> <sub>581</sub> (C <sup>-245</sup> C <sup>-246</sup> C <sup>-247</sup> ) |
| FlhDC <sub>581</sub> (C <sup>-245</sup> C <sup>-246</sup> C <sup>-247</sup> )-R1 | <u>GGGTTAAATTTGTA</u> AAAATAGTTTCATGGTGACTAAACACTATCGAA     |                                                                                                                             |
| FlhDC <sub>581</sub> (C <sup>-245</sup> C <sup>-246</sup> C <sup>-247</sup> )-F2 | TATTTTTACAAATTTAACCCGATTATTCCTAAAGCAGCGCAACTCTACC           |                                                                                                                             |
| FlhDC <sub>581</sub> (C <sup>-245</sup> C <sup>-246</sup> C <sup>-247</sup> )-R2 | GAAAATTAGAACAGCCTCAGGCGG                                    |                                                                                                                             |
| FlhDC <sub>581</sub> (A <sup>-254</sup> A <sup>-255</sup> A <sup>-256</sup> )-F1 | GGCAAATTAATCTCTCAAAAACGACTGC                                | Amplification of mutated DNA fragment <i>PflhDC</i> <sub>581</sub> (A <sup>-254</sup> A <sup>-255</sup> A <sup>-256</sup> ) |
| FlhDC <sub>581</sub> (A <sup>-254</sup> A <sup>-255</sup> A <sup>-256</sup> )-R1 | <u>TTTATAATCTTATTA</u> AAATTTGTA AAAATAGTTTCATGGTGACTAAACAC |                                                                                                                             |
| FlhDC <sub>581</sub> (A <sup>-254</sup> A <sup>-255</sup> A <sup>-256</sup> )-F2 | AAATTTAATAAGATTATA <u>AAATA</u> AAAGCAGCGCAACTCTACCCC       |                                                                                                                             |
| FlhDC <sub>581</sub> (A <sup>-254</sup> A <sup>-255</sup> A <sup>-256</sup> )-R2 | GAAAATTAGAACAGCCTCAGGCGG                                    |                                                                                                                             |
| FlhDC <sub>581</sub> (RcsB-1 <sup>-</sup> )-F1                                   | GGCAAATTAATCTCTCAAAAACGACTGC                                | Amplification of mutated DNA fragment <i>PflhDC</i> <sub>581</sub> (RcsB-1 <sup>-</sup> )                                   |
| FlhDC <sub>581</sub> (RcsB-1 <sup>-</sup> )-R1                                   | TTAAATTTGTA AAAATAGTTTCATGGTGACTAAACACTATCG                 |                                                                                                                             |
| FlhDC <sub>581</sub> (RcsB-1 <sup>-</sup> )-F2                                   | AACTATTTTTACAAATTTAAAAGCAGCGCAACTCTACCCC                    |                                                                                                                             |
| FlhDC <sub>581</sub> (RcsB-1 <sup>-</sup> )-R2                                   | GAAAATTAGAACAGCCTCAGGCGG                                    |                                                                                                                             |
| FlhDC <sub>581</sub> (C <sup>-634</sup> C <sup>-635</sup> C <sup>-636</sup> )-F1 | GGCAAATTAATCTCTCAAAAACGACTGC                                | Amplification of mutated DNA fragment <i>PflhDC</i> <sub>581</sub> (C <sup>-634</sup> C <sup>-635</sup> C <sup>-636</sup> ) |
| FlhDC <sub>581</sub> (C <sup>-634</sup> C <sup>-635</sup> C <sup>-636</sup> )-R1 | <u>GGGGTCAAATCCG</u> ATAGCTAATAACCTTATAGTTTAC               |                                                                                                                             |
| FlhDC <sub>581</sub> (C <sup>-634</sup> C <sup>-635</sup> C <sup>-636</sup> )-F2 | TAGCTATCGGATTTGACCCCAGCCCTCCGCCTGAGGCTGTT                   |                                                                                                                             |
| FlhDC <sub>581</sub> (C <sup>-634</sup> C <sup>-635</sup> C <sup>-636</sup> )-R2 | GAAAATTAGAACAGCCTCAGGCGG                                    |                                                                                                                             |
| FlhDC <sub>581</sub> (RcsB-2 <sup>-</sup> )-F1                                   | GGCAAATTAATCTCTCAAAAACGACTGC                                | Amplification of mutated DNA fragment <i>PflhDC</i> <sub>581</sub> (RcsB-2 <sup>-</sup> )                                   |



---

|                                  |                                           |
|----------------------------------|-------------------------------------------|
| FlhDC <sub>581</sub> (RcsB-2)-R1 | TAGCTAATAACCTTATAGTTTACATTGGTTATTTTCAGC   |
| FlhDC <sub>581</sub> (RcsB-2)-F2 | AACTATAAGGTTATTAGCTAAGCCCTCCGCCTGAGGCTGTT |
| FlhDC <sub>581</sub> (RcsB-2)-R2 | GAAAATTAGAACAGCCTCAGGCGG                  |

---

91 The sequences wavelined stand for the mutated bases in the predicted RcsB binding site RcsB-1 or RcsB-2.

92

93

94

95

96

97

98

99

100

101

**Table S2. Primers used for RT-qPCR analysis in this study**

| <b>Primer</b> | <b>Primer sequence (5'-3')</b> | <b>Function</b>                                 |
|---------------|--------------------------------|-------------------------------------------------|
| PigA-RT-F     | ATGGCTTTATGGGCGTGTCC           | qPCR primers, coding region of gene <i>pigA</i> |
| PigA-RT-R     | GAGAGGCAATCTTTCGGGCT           |                                                 |
| PigB-RT-F     | AACCGACGACGACTTCACCC           | qPCR primers, coding region of gene <i>pigB</i> |
| PigB-RT-R     | CGGTCTGAGCGGCGTATATAAATC       |                                                 |
| PigC-RT-F     | AAGTTCACGACCCGCTACGC           | qPCR primers, coding region of gene <i>pigC</i> |
| PigC-RT-R     | GGGGCCATAGGGGTTTTTGTAC         |                                                 |
| PigD-RT-F     | TGATAGGTATTGATGACGGACAGAC      | qPCR primers, coding region of gene <i>pigD</i> |
| PigD-RT-R     | CCATCCGCAGTTGCTGAATAAA         |                                                 |
| PigE-RT-F     | GGGTGTTCTTCAGCAACTCCG          | qPCR primers, coding region of gene <i>pigE</i> |
| PigE-RT-R     | CGGCGGTGTTTGTCTCGTC            |                                                 |
| PigF-RT-F     | CTCGCCCCATAGCGGATACA           | qPCR primers, coding region of gene <i>pigF</i> |
| PigF-RT-R     | GTTGAGCGACGAACCCAGT            |                                                 |
| PigG-RT-F     | TCCTGACGCAGAAAATCCACC          | qPCR primers, coding region of gene <i>pigG</i> |
| PigG-RT-R     | TGAATGCTCAAACCCCGCTG           |                                                 |
| PigH-RT-F     | CAAACGAAGCCGCCTAACCC           | qPCR primers, coding region of gene <i>pigH</i> |
| PigH-RT-R     | CACGGCGGAACACTTCAATATG         |                                                 |
| PigI-RT-F     | CGAAGGTGCTCAGATCAAAGGC         | qPCR primers, coding region of gene <i>pigI</i> |

---

|           |                            |                                                 |
|-----------|----------------------------|-------------------------------------------------|
| PigI-RT-R | CTTCAGGCTCCACAGGCACC       |                                                 |
| PigJ-RT-F | ATGGCGTGAGCGGTGTAGG        | qPCR primers, coding region of gene <i>pigJ</i> |
| PigJ-RT-R | CATCGACTATCAGCCCATCACC     |                                                 |
| PigK-RT-F | GCCTGGTAATCGGTCGTCTCC      | qPCR primers, coding region of gene <i>pigK</i> |
| PigK-RT-R | GCTAAAAGACATCGCCCACCG      |                                                 |
| PigL-RT-F | ACGGTTGTCCACTCGCCTCAT      | qPCR primers, coding region of gene <i>pigL</i> |
| PigL-RT-R | CCTCTGTCGGCGGTGAAAAA       |                                                 |
| PigM-RT-F | GCTCGGCACTTTCGTCGTTC       | qPCR primers, coding region of gene <i>pigM</i> |
| PigM-RT-R | CTTCAAGTGGCGTTTCATCCTC     |                                                 |
| PigN-RT-F | AACATCGGGCGAGTGTCCTG       | qPCR primers, coding region of gene <i>pigN</i> |
| PigN-RT-R | TTGCCCTGCTGGCGTTTATTA      |                                                 |
| FlhD-RT-F | CATTTTGCTATCAAGCCATTTACTGC | qPCR primers, coding region of gene <i>flhD</i> |
| FlhD-RT-R | GGCTCTTTTCTTCGTCGGGC       |                                                 |
| FlhC-RT-F | TCGTTCAAGAAGCCAAGGACATT    | qPCR primers, coding region of gene <i>flhC</i> |
| FlhC-RT-R | AACGGTAACATTCCTTTTGGCG     |                                                 |
| MotA-RT-F | TTGCTGTTCCGTCTGCTGG        | qPCR primers, coding region of gene <i>motA</i> |
| MotA-RT-R | CAGCCGTAAATAGTCGGTAATGAA   |                                                 |
| FlhB-RT-F | TTCTGTTCAAGCGGCAAGTCG      | qPCR primers, coding region of gene <i>flhB</i> |
| FlhB-RT-R | GTGACCCAACCGACCAACG        |                                                 |
| FlgE-RT-F | ACACCATCACCGCCTACGACT      | qPCR primers, coding region of gene <i>flgE</i> |

---

---

|                     |                          |                                                           |
|---------------------|--------------------------|-----------------------------------------------------------|
| FlgE-RT-R           | TGTCTTCGGTCTTCACAAAGTAGG |                                                           |
| FliF-RT-F           | TGAACAATACCAGCCGAACCA    | qPCR primers, coding region of gene <i>fliF</i>           |
| FliF-RT-R           | GCTTGGCGGTTTCAATCGG      |                                                           |
| GalU-RT-F           | GTCAAGGACAGGCGAAAGGG     | qPCR primers, coding region of gene <i>galU</i>           |
| GalU-RT-R           | ATCATCCAATAAAACATCGGGC   |                                                           |
| Wza-RT-F            | GTGACGGGCGAAGTTACCAAA    | qPCR primers, coding region of gene <i>wza</i>            |
| Wza-RT-R            | GCCAGTCGGCATTTCAGTCA     |                                                           |
| NeuB-RT-F           | CGTATTGGTGCCGCTTTGGG     | qPCR primers, coding region of gene <i>neuB</i>           |
| NeuB-RT-R           | TGGGAATGGAGGCATCGTTTG    |                                                           |
| Wzx-RT-F            | CGAAACCGTCCCCATCACTG     | qPCR primers, coding region of gene <i>wzx</i>            |
| Wzx-RT-R            | CGACCCGTTGGAGCAGGAGTA    |                                                           |
| Wzy-RT-F            | CCTGGCGAGAAGTGCTGGAAG    | qPCR primers, coding region of gene <i>wzy</i>            |
| Wzy-RT-R            | AGACCACCCTCAACCCACCAC    |                                                           |
| ManC-RT-F           | AACCTCAAAGCGTTGTCGTCG    | qPCR primers, coding region of gene <i>manC</i>           |
| ManC-RT-R           | GAGACCTAAGTGGAAGTGGCAAA  |                                                           |
| ManB-RT-F           | GCTGAAGCGGGTAAACTGGC     | qPCR primers, coding region of gene <i>manB</i>           |
| ManB-RT-R           | ACGCCGCAAATACTGGAACC     |                                                           |
| SpeA-RT-F           | GAACGGGTGCCTTCGTAGTCG    | qPCR primers, coding region of gene <i>speA</i>           |
| SpeA-RT-R           | GAACGGGTGCCTTCGTAGTCG    |                                                           |
| SMDB11_RS08645-RT-F | ATTTTTATGCCCGTTTCGTGC    | qPCR primers, coding region of gene <i>SMDB11_RS08645</i> |

---

---

|                     |                         |                                                 |
|---------------------|-------------------------|-------------------------------------------------|
| SMDB11_RS08645-RT-R | TCGGTCGCTGCTCTGAGGAT    |                                                 |
| ArgF-RT-F           | CAAGACGCCGACTTCCTCTACAC | qPCR primers, coding region of gene <i>argF</i> |
| ArgF-RT-R           | CGTGGTTTGGTCGTCGTGG     |                                                 |
| CadC-RT-F           | CTGTGGCAACGGTGGAGTCAT   | qPCR primers, coding region of gene <i>cadC</i> |
| CadC-RT-R           | CAGCAAAGAGGCGAGTAGCGT   |                                                 |
| 16S rRNA-RT-F       | CACACCGCCCGTCACACCA     | qPCR primers, coding region of gene 16S rRNA    |
| 16S rRNA-RT-R       | CGCAGGTTCCCCTACGGTTAC   |                                                 |

---

103

104

105

106

107

108

109

110

111 **Table S3. Primers used for gene knockout in this study**

| Primer     | Primer sequence (5'-3')                                                   | Function                                                      |
|------------|---------------------------------------------------------------------------|---------------------------------------------------------------|
| RcsA-D-U-F | <u>TAGGCCGAATTCGAGCTCGGTACCGTGTTTCTGTCAGCGCTGGACG</u>                     | The upstream fragment for knocking out the <i>rscA</i> gene   |
| RcsA-D-U-R | <u>TTGAATGTATTTAGAAAAATAAACAAATAGGGGTTCGCGATCGCACCCCCACTTAAATCCG</u>      |                                                               |
| RcsA-D-D-F | <u>ATGCGAAGAATGCGATGCCGCTCGCCAGTCGATTGGCTGACCGCTGAACCACAGAGAACG</u>       | The downstream fragment for knocking out the <i>rscA</i> gene |
| RcsA-D-D-R | <u>ATTACAGCCGGATCCCCGGGTACCTCGCCATGGCGGCTTACAT</u>                        |                                                               |
| RcsB-D-U-F | <u>TAGGCCGAATTCGAGCTCGGTACCCTCTGGTTATCGACCATGAGCCC</u>                    | The upstream fragment for knocking out the <i>rscB</i> gene   |
| RcsB-D-U-R | <u>TTGAATGTATTTAGAAAAATAAACAAATAGGGGTTCGCGGTTGTTGGCTACCTTGCTTCAGC</u>     |                                                               |
| RcsB-D-D-F | <u>ATGCGAAGAATGCGATGCCGCTCGCCAGTCGATTGGCTGAAAAGCCCGCCTCACGGCAG</u>        | The downstream fragment for knocking out the <i>rscB</i> gene |
| RcsB-D-D-R | <u>ATTACAGCCGGATCCCCGGGTACCTGGCGATCTGCGAGAAGTTGG</u>                      |                                                               |
| RcsC-D-U-F | <u>CCTAGGCCGAATTCGAGCTCGGTACCGGGCTGTTTGTCGATACAGTACCC</u>                 | The upstream fragment for knocking out the <i>rscC</i> gene   |
| RcsC-D-U-R | <u>TTGAATGTATTTAGAAAAATAAACAAATAGGGGTTCGCGAACGGGTACGCTACAACCG</u>         |                                                               |
| RcsC-D-D-F | <u>ATGCGAAGAATGCGATGCCGCTCGCCAGTCGATTGGCTGATCGGATACCATACGAAAGTCAGTGAC</u> | The downstream fragment for knocking out the <i>rscC</i> gene |
| RcsC-D-D-R | <u>GGATTACAGCCGGATCCCCGGGTACCGTGTACCAACTGCCTGAAGCCA</u>                   |                                                               |
| RcsD-D-U-F | <u>TAGGCCGAATTCGAGCTCGGTACCGATGCCGCTGACCGGTTTCC</u>                       | The upstream fragment for knocking out the <i>rscD</i> gene   |
| RcsD-D-U-R | <u>TTGAATGTATTTAGAAAAATAAACAAATAGGGGTTCGCGAGTGGCTGCGCATTCTGAA</u>         |                                                               |
| RcsD-D-D-F | <u>ATGCGAAGAATGCGATGCCGCTCGCCAGTCGATTGGCTGAGACTGCTGAAGCAAGGTAGCC</u>      | The downstream fragment for knocking out the <i>rscD</i> gene |

---

|             |                                                                             |                                                                |
|-------------|-----------------------------------------------------------------------------|----------------------------------------------------------------|
| RcsD-D-D-R  | <u>ATTACAGCCGGATCCCCGGGTACCGCAGATGCAGTTCAGTGCGC</u>                         |                                                                |
| RcsF-D-U-F  | <u>TAGGCCGAATTCGAGCTCGGTACCTCGCATCGTCAAAGCCGTTACC</u>                       | The upstream fragment for knocking out the <i>rscF</i> gene    |
| RcsF-D-U-R  | <u>TTGAATGTATTTAGAAAAATAAACAAATAGGGGTCCGCGTGAGATTCCTCTGCCTTAATGAAAGTGGC</u> |                                                                |
| RcsF-D-D-F  | <u>ATGCGAAGAATGCGATGCCGCTCGCCAGTCGATTGGCTGACCGAATTCGTTTTCGAGCAGATCG</u>     | The downstream fragment for knocking out the <i>rscF</i> gene  |
| RcsF-D-D-R  | <u>ATTACAGCCGGATCCCCGGGTACCCAACCTTCTTCAGAACGCGCAG</u>                       |                                                                |
| IgaA-D-U-F  | <u>TAGGCCGAATTCGAGCTCGGTACCTGCCTCGGAAAGGAACAGCG</u>                         | The upstream fragment for knocking out the <i>igaA</i> gene    |
| IgaA-D-U-R  | <u>TTGAATGTATTTAGAAAAATAAACAAATAGGGGTCCGCGGCAATCCCCATCTCACACCCG</u>         |                                                                |
| IgaA-D-D-F  | <u>ATGCGAAGAATGCGATGCCGCTCGCCAGTCGATTGGCTGACGATGGCTGAACCTGACGC</u>          | The downstream fragment for knocking out the <i>igaA</i> gene  |
| IgaA-D-D-R  | <u>ATTACAGCCGGATCCCCGGGTACCGCACGATCACCGTACGTTCTTCG</u>                      |                                                                |
| FlhDC-D-U-F | <u>TAGGCCGAATTCGAGCTCGGTACCGCACGTGTTCTTCCAGCTCAAC</u>                       | The upstream fragment for knocking out the <i>flhDC</i> gene   |
| FlhDC-D-U-R | <u>TTGAATGTATTTAGAAAAATAAACAAATAGGGGTCCGCGCCATTGAGCCGCCACATTGC</u>          |                                                                |
| FlhDC-D-D-F | <u>ATGCGAAGAATGCGATGCCGCTCGCCAGTCGATTGGCTGAATTCCCCATCCCGACAGACTATG</u>      | The downstream fragment for knocking out the <i>flhDC</i> gene |
| FlhDC-D-D-R | <u>ATTACAGCCGGATCCCCGGGTACCGCTGCTTGCGTTGAAAAACCG</u>                        |                                                                |
| AacC3-D-F   | CGCGGAACCCCTATTGTTTATTTTTCT                                                 | Amplification of <i>aacC3</i> gene for gene knocking out       |
| AacC3-D-R   | TCAGCCAATCGACTGGCGAGC                                                       |                                                                |

---

112 a. The sequences underlined stand for the homologous sequence of the pUTKm plasmid.

113 b. The sequences wavelined stand for the homologous sequence of the apramycin resistance *aacC3* gene.

114 **Table S4. Genes significantly upregulated in the *rcsB* mutant relative to the wild-type strain of *S. marcescens***

| <b>GeneName</b> | <b>Gene sizes (bp)</b> | <b>JNB5-1_FPKM</b> | <b>SK68_FP KM</b> | <b>log<sub>2</sub>FC (SK68 vs JNB5-1)</b> | <b>P-Value</b> | <b>Product</b>                                                | <b>KEGG</b> |
|-----------------|------------------------|--------------------|-------------------|-------------------------------------------|----------------|---------------------------------------------------------------|-------------|
| <i>abgA</i>     | 1317                   | 11.87              | 28.25             | 1.336950781                               | 0.04955572     | p-aminobenzoyl-glutamate hydrolase, A subunit                 | -           |
| <i>abgT</i>     | 1527                   | 11.73              | 28.84             | 1.384040849                               | 0.041587833    | p-aminobenzoyl-glutamate transporter                          | -           |
| <i>agaS</i>     | 1167                   | 2.6                | 7.15              | 1.539744481                               | 0.038745116    | Tagatose-6-phosphate ketose/aldose isomerase                  | -           |
| <i>araB</i>     | 1638                   | 24.38              | 58.25             | 1.342652462                               | 0.045543056    | L-ribulokinase                                                | -           |
| <i>argO</i>     | 618                    | 17.39              | 50.27             | 1.61713374                                | 0.019750919    | Arginine transporter                                          | -           |
| <i>argT</i>     | 783                    | 204.86             | 775.44            | 2.006816997                               | 0.003111407    | Lysine/arginine/ornithine transporter subunit                 | K10014      |
| <i>bcsG</i>     | 1656                   | 27.26              | 71.16             | 1.470286888                               | 0.028675091    | Putative endoglucanase, DUF3260 family                        | -           |
| <i>bcsZ</i>     | 1104                   | 48.96              | 128.23            | 1.47544421                                | 0.028040208    | Endo-1, 4-D-glucanase                                         | K01179      |
| <i>bglF</i>     | 1866                   | 0.23               | 1.51              | 2.746044319                               | 0.005759502    | Beta-glucoside-specific PTS system IIABC component            | K02755      |
| <i>bioC</i>     | 768                    | 0.14               | 1.57              | 3.407675099                               | 0.019786881    | Malonyl-CoA methyltransferase, SAM-dependent                  | K02169      |
| <i>cadB</i>     | 1344                   | 4.12               | 82.14             | 4.401144421                               | 9.91E-09       | Putative lysine/cadaverine transporter                        | -           |
| <i>ccmD</i>     | 237                    | 0                  | 4.67              | 6.46403802                                | 0.006149306    | Heme exporter protein D                                       | K02196      |
| <i>chbA</i>     | 339                    | 47.7               | 121.01            | 1.428747033                               | 0.03577257     | N, N'-diacetylchitobiose-specific enzyme IIA component of PTS | K02759      |
| <i>chbB</i>     | 318                    | 17.41              | 103.39            | 2.654019246                               | 0.000235015    | N, N'-diacetylchitobiose-specific enzyme IIB component of PTS | K02760      |
| <i>cheA</i>     | 2004                   | 167.4              | 464.38            | 1.558521484                               | 0.019833886    | Chemotaxis regulator, signal transduction histidine kinase    | K03407      |
| <i>cheR</i>     | 831                    | 284.18             | 687.94            | 1.361929819                               | 0.040855134    | Chemotaxis regulator, protein-glutamate methyltransferase     | K00575      |
| <i>cheW</i>     | 501                    | 444.29             | 1328.91           | 1.667124267                               | 0.013026519    | Purine-binding chemotaxis protein                             | K03408      |
| <i>cheY</i>     | 390                    | 53.99              | 175.56            | 1.78718798                                | 0.009076422    | Chemotaxis regulator, receiver protein                        | K03413      |
| <i>chiP</i>     | 1404                   | 8.12               | 26.93             | 1.815368962                               | 0.008849746    | Chitoporin                                                    | -           |
| <i>citC</i>     | 1071                   | 4.15               | 45.62             | 3.539523393                               | 2.21E-06       | [citrate [pro-3S]-lyase] ligase                               | K01910      |



|             |      |        |         |             |             |                                                                   |        |
|-------------|------|--------|---------|-------------|-------------|-------------------------------------------------------------------|--------|
| <i>citD</i> | 288  | 0      | 13.27   | 8.240875514 | 4.28E-06    | Citrate lyase, acyl carrier gamma subunit                         | K01646 |
| <i>citE</i> | 921  | 3.54   | 29.91   | 3.162099952 | 2.45E-05    | Citrate lyase, citryl-ACP lyase beta subunit                      | K01644 |
| <i>citF</i> | 1509 | 10.14  | 36.85   | 1.946889665 | 0.00478224  | Citrate lyase, citrate-ACP transferase alpha subunit              | K01643 |
| <i>citG</i> | 885  | 1.23   | 8.86    | 2.924272514 | 0.000423146 | 2-(5''-triphosphoribosyl)-3'-dephosphocoenzyme-A synthase         | K05966 |
| <i>cysA</i> | 1089 | 20.63  | 93.71   | 2.269336907 | 0.001055614 | Sulfate/thiosulfate transporter subunit                           | K02045 |
| <i>cysC</i> | 690  | 1.73   | 11.95   | 2.86041216  | 0.000478524 | Adenosine 5'-phosphosulfate kinase                                | K00860 |
| <i>cysD</i> | 909  | 29.97  | 158.61  | 2.489944651 | 0.000347927 | Sulfate adenylyltransferase, subunit 2                            | K00957 |
| <i>cysH</i> | 735  | 36.18  | 253.75  | 2.896178213 | 4.19E-05    | 3'-phosphoadenosine 5'-phosphosulfate reductase                   | K00390 |
| <i>cysI</i> | 1716 | 45.54  | 191.36  | 2.157507756 | 0.001604587 | Sulfite reductase, beta subunit                                   | K00381 |
| <i>cysJ</i> | 1803 | 23.96  | 80.69   | 1.838145418 | 0.006769057 | Sulfite reductase, alpha subunit                                  | K00380 |
| <i>cysN</i> | 1428 | 21.74  | 158.42  | 2.951538026 | 3.00E-05    | Sulfate adenylyltransferase, subunit 1                            | K00956 |
| <i>ddpC</i> | 870  | 6.36   | 18.84   | 1.650159691 | 0.01949314  | D-ala-D-ala transporter subunit                                   | K02034 |
| <i>dhaK</i> | 1071 | 166.19 | 1733.05 | 3.468858271 | 1.41E-06    | Dihydroxyacetone kinase                                           | K05878 |
| <i>dhaL</i> | 633  | 70.29  | 751.76  | 3.504905854 | 1.24E-06    | Dihydroxyacetone kinase                                           | K05879 |
| <i>dhaM</i> | 1431 | 193.02 | 1264.81 | 2.798603952 | 6.18E-05    | Dihydroxyacetone-specific PTS system HPr/EI component             | K05881 |
| <i>dppF</i> | 990  | 63.91  | 149.39  | 1.311290801 | 0.049857505 | Dipeptide transporter                                             | K12372 |
| <i>entD</i> | 735  | 0      | 0.96    | 5.821269516 | 0.034782609 | phosphopantetheinyltransferase component of enterobactin synthase | K02362 |
| <i>feoA</i> | 225  | 50.65  | 160.87  | 1.752654692 | 0.01141805  | Ferrous iron transporter, protein A                               | -      |
| <i>flgB</i> | 414  | 16.25  | 381.52  | 4.636749545 | 2.20E-09    | Flagellar basal-body rod protein FlgB                             | K02387 |
| <i>flgC</i> | 405  | 8.84   | 193.39  | 4.532153666 | 6.63E-09    | Flagellar basal-body rod protein FlgC                             | K02388 |
| <i>flgD</i> | 678  | 12.81  | 302.37  | 4.645817703 | 1.73E-09    | Flagellar basal-body rod modification protein FlgD                | K02389 |
| <i>flgE</i> | 1224 | 25.8   | 585.67  | 4.590466529 | 1.56E-09    | Flagellar hook protein FlgE                                       | K02390 |
| <i>flgF</i> | 756  | 13.06  | 186.45  | 3.919886095 | 1.50E-07    | Flagellar basal-body rod protein FlgF                             | K02391 |
| <i>flgG</i> | 783  | 14.42  | 345.54  | 4.668080305 | 1.28E-09    | Flagellar basal-body rod protein FlgG                             | K02392 |

|             |      |         |          |             |             |                                                      |        |
|-------------|------|---------|----------|-------------|-------------|------------------------------------------------------|--------|
| <i>flgH</i> | 654  | 6.31    | 114.38   | 4.263021176 | 3.07E-08    | Flagellar L-ring protein precursor FlgH              | K02393 |
| <i>flgI</i> | 1101 | 3.35    | 75.34    | 4.57200154  | 5.01E-09    | Flagellar P-ring protein precursor FlgI              | K02394 |
| <i>flgJ</i> | 945  | 3.22    | 45.96    | 3.917824413 | 3.58E-07    | Flagellar protein FlgJ                               | -      |
| <i>flgK</i> | 1650 | 564.28  | 1552.97  | 1.547054342 | 0.020637594 | Flagellar hook-associated protein 1 FlgK             | K02396 |
| <i>flgL</i> | 960  | 922.83  | 2822.49  | 1.699343238 | 0.011363383 | Flagellar protein FlgJ                               | K02397 |
| <i>flgM</i> | 312  | 110.62  | 458.24   | 2.136632824 | 0.00187321  | Negative regulator of flagellin synthesis FlgM       | K02398 |
| <i>flgN</i> | 435  | 282.17  | 1014.66  | 1.93274979  | 0.004334402 | Flagella synthesis protein FlgN                      | K02399 |
| <i>flhA</i> | 2079 | 6.11    | 28.92    | 2.328657621 | 0.000883119 | Flagellar biosynthesis protein FlhA                  | K02400 |
| <i>flhB</i> | 1152 | 3.01    | 16.5     | 2.533870281 | 0.000591373 | Flagellar biosynthesis protein FlhB                  | K02401 |
| <i>flhC</i> | 582  | 61.72   | 198.66   | 1.772593089 | 0.00905084  | DNA-binding transcriptional dual regulator with FlhD | K02402 |
| <i>flhD</i> | 351  | 27.21   | 161.27   | 2.652095918 | 0.000198995 | DNA-binding transcriptional dual regulator with FlhC | K02403 |
| <i>fliA</i> | 723  | 5.25    | 28.92    | 2.543174035 | 0.000523713 | RNA polymerase, sigma 28 factor                      | K02405 |
| <i>fliC</i> | 1083 | 8584.86 | 38929.48 | 2.267521215 | 0.000915221 | Flagellar filament structural protein                | K02406 |
| <i>fliD</i> | 1401 | 1147.72 | 3968.41  | 1.876307006 | 0.005433606 | Flagellar filament capping protein                   | K02407 |
| <i>fliF</i> | 1695 | 3.84    | 44.37    | 3.613513617 | 1.23E-06    | Flagellar M-ring protein FliF                        | K02409 |
| <i>fliG</i> | 993  | 5.9     | 56.5     | 3.342495827 | 5.58E-06    | Flagellar motor switch protein FliG                  | K02410 |
| <i>fliH</i> | 705  | 3.69    | 67.31    | 4.266877209 | 5.29E-08    | Flagellar assembly protein FliH                      | K02411 |
| <i>fliI</i> | 1362 | 1.51    | 43.11    | 4.909070144 | 1.39E-09    | Flagellum-specific ATP synthase                      | K02412 |
| <i>fliJ</i> | 447  | 2.91    | 48.36    | 4.125492386 | 4.52E-07    | Flagellar FliJ protein                               | K02413 |
| <i>fliK</i> | 1230 | 0.88    | 7.85     | 3.223396364 | 9.67E-05    | Flagellar hook-length control protein FliK           | K02414 |
| <i>fliL</i> | 486  | 3.13    | 46.96    | 3.983519884 | 7.43E-07    | Flagellar FliL protein                               | -      |
| <i>fliM</i> | 1005 | 3.78    | 88.94    | 4.638104558 | 3.17E-09    | Flagellar motor switch protein FliM                  | K02416 |
| <i>fliN</i> | 417  | 12.49   | 112.6    | 3.255228733 | 9.87E-06    | Flagellar motor switch protein FliN                  | K02417 |
| <i>fliO</i> | 405  | 0.54    | 33.27    | 5.956925925 | 7.07E-09    | Flagellar biosynthesis protein FliO                  | K02418 |

|             |      |        |         |             |             |                                                              |        |
|-------------|------|--------|---------|-------------|-------------|--------------------------------------------------------------|--------|
| <i>fliP</i> | 762  | 2.71   | 26.26   | 3.356472288 | 1.53E-05    | Flagellar biosynthetic protein FliP                          | K02419 |
| <i>fliQ</i> | 270  | 0      | 2.61    | 5.821269516 | 0.034782609 | Flagellar biosynthesis protein FliQ                          | K02420 |
| <i>fliR</i> | 783  | 0      | 5.14    | 8.314637628 | 2.94E-06    | Flagellar biosynthesis protein FliR                          | K02421 |
| <i>fliS</i> | 411  | 392.13 | 1354.01 | 1.874277292 | 0.005554555 | Flagellar protein potentiates polymerization                 | K02422 |
| <i>fliT</i> | 369  | 261.47 | 1116.31 | 2.180400268 | 0.0014271   | Putative chaperone                                           | K02423 |
| <i>fliZ</i> | 510  | 2.98   | 37.06   | 3.711726306 | 3.59E-06    | RpoS antagonist                                              | K02425 |
| <i>galK</i> | 1152 | 8.38   | 292.2   | 5.207641002 | 4.20E-11    | Galactokinase                                                | K00849 |
| <i>galM</i> | 1044 | 3.33   | 114.7   | 5.188776511 | 1.02E-10    | Galactose-1-epimerase                                        | K01785 |
| <i>galS</i> | 1038 | 10.98  | 39.13   | 1.91895809  | 0.005737694 | DNA-binding transcriptional repressor                        | -      |
| <i>galT</i> | 1053 | 5.26   | 221.04  | 5.477191515 | 9.37E-12    | Galactose-1-phosphate uridylyltransferase                    | K00965 |
| <i>gldA</i> | 1101 | 386.7  | 3359.96 | 3.205645127 | 6.45E-06    | Glycerol dehydrogenase, NAD                                  | K00005 |
| <i>gltI</i> | 897  | 486.62 | 1655.85 | 1.853190172 | 0.006021482 | Glutamate, aspartate binding protein, periplasmic            | K10001 |
| <i>gntK</i> | 540  | 0      | 2.61    | 6.808455209 | 0.001996045 | Gluconate kinase 2                                           | K00851 |
| <i>gntU</i> | 1338 | 0.08   | 1.95    | 4.515055775 | 0.000385253 | Gluconate transporter, low affinity GNT 1 system             | -      |
| <i>gpr</i>  | 990  | 14.69  | 142.79  | 3.366331391 | 3.39E-06    | L-glyceraldehyde 3-phosphate reductase                       | -      |
| <i>gutM</i> | 357  | 7.3    | 20.28   | 1.55629709  | 0.040272556 | DNA-binding transcriptional activator of glucitol operon     | -      |
| <i>hcaD</i> | 1212 | 16.57  | 40.07   | 1.360152357 | 0.045485375 | Phenylpropionate dioxygenase, ferredoxin reductase subunit   | K00529 |
| <i>kdpB</i> | 2070 | 2.31   | 6.02    | 1.468415634 | 0.039702125 | Potassium translocating ATPase, subunit B                    | K01547 |
| <i>lamB</i> | 1290 | 54.52  | 280.19  | 2.447945139 | 0.000395265 | Maltose outer membrane porin (maltoporin)                    | -      |
| <i>mglA</i> | 1509 | 7.41   | 255.58  | 5.193442982 | 4.24E-11    | Galactose/methyl galactoside transporter ATP-binding protein | K10542 |
| <i>mglB</i> | 993  | 463.29 | 1464.08 | 1.746486554 | 0.009402528 | Methyl-galactoside transporter subunit                       | K10540 |
| <i>mglC</i> | 1011 | 15.89  | 266.42  | 4.153129904 | 2.88E-08    | Methyl-galactoside transporter subunit                       | K10541 |
| <i>moaB</i> | 516  | 15.77  | 39.94   | 1.425409835 | 0.042368924 | Molybdopterin biosynthesis protein B                         | K03638 |
| <i>motA</i> | 891  | 191.96 | 483.19  | 1.418190733 | 0.033561049 | Chemotaxis protein MotA                                      | K02556 |

|                       |      |        |         |             |             |                                                              |        |
|-----------------------|------|--------|---------|-------------|-------------|--------------------------------------------------------------|--------|
| <i>motB</i>           | 1065 | 108.12 | 270.85  | 1.411262616 | 0.034593317 | Chemotaxis protein MotB                                      | K02557 |
| <i>mrjD3</i>          | 765  | 0      | 2.5     | 7.245636611 | 0.000390825 | Fimbrial chaperone MrjD                                      | -      |
| <i>potE</i>           | 1317 | 276.8  | 795.78  | 1.610013977 | 0.016252005 | Putrescine/proton symporter: putrescine/ornithine antiporter | -      |
| <i>prpR</i>           | 1587 | 11.69  | 36.55   | 1.730089025 | 0.011317118 | Propionate catabolism operon regulatory protein              | -      |
| <i>ribB</i>           | 654  | 444.07 | 1818.51 | 2.120371123 | 0.001845285 | 3, 4-dihydroxy-2-butanone-4-phosphate synthase               | K02858 |
| <i>SMWW4_v1c00170</i> | 840  | 48.19  | 123.76  | 1.446929556 | 0.031382738 | Extracellular solute-binding protein                         | -      |
| <i>SMWW4_v1c00690</i> | 1929 | 409.13 | 1381.1  | 1.841686126 | 0.006307713 | Methyl-accepting chemotaxis sensory transducer               | K05875 |
| <i>SMWW4_v1c01070</i> | 393  | 0      | 2.56    | 6.328167771 | 0.009223959 | Hypothetical protein                                         | -      |
| <i>SMWW4_v1c01540</i> | 204  | 3.19   | 17.25   | 2.496245653 | 0.00638213  | Cellulose biosynthesis protein BcsF                          | -      |
| <i>SMWW4_v1c01560</i> | 192  | 14.13  | 60.74   | 2.184799464 | 0.003483529 | Hypothetical protein                                         | -      |
| <i>SMWW4_v1c04050</i> | 1554 | 35.76  | 125.77  | 1.900801243 | 0.005120754 | Methyl-accepting chemotaxis sensory transducer               | K05877 |
| <i>SMWW4_v1c04440</i> | 228  | 2.38   | 16.76   | 2.871686585 | 0.002125618 | Hypothetical protein                                         | -      |
| <i>SMWW4_v1c04520</i> | 2163 | 228.4  | 1176.42 | 2.451290427 | 0.000373522 | Ornithine decarboxylase                                      | K01581 |
| <i>SMWW4_v1c05190</i> | 204  | 31.39  | 80.83   | 1.449233476 | 0.041355343 | Hypothetical protein                                         | -      |
| <i>SMWW4_v1c05260</i> | 396  | 0      | 7.62    | 7.901109759 | 2.25E-05    | Hypothetical protein                                         | -      |
| <i>SMWW4_v1c05480</i> | 747  | 0.15   | 1.35    | 3.147636445 | 0.039970491 | TonB family protein                                          | -      |
| <i>SMWW4_v1c05490</i> | 2244 | 1.74   | 4.48    | 1.447033168 | 0.046500719 | TonB-dependent receptor                                      | -      |
| <i>SMWW4_v1c05500</i> | 651  | 0.17   | 2.16    | 3.627923883 | 0.010215054 | MotA/TolQ/ExbB proton channel                                | -      |
| <i>SMWW4_v1c05600</i> | 1302 | 0.83   | 2.86    | 1.850900243 | 0.029463659 | FAD dependent oxidoreductase                                 | K09471 |
| <i>SMWW4_v1c05630</i> | 1113 | 9.46   | 31.62   | 1.826219497 | 0.008684979 | Histone deacetylase superfamily protein                      | -      |
| <i>SMWW4_v1c05950</i> | 846  | 5.26   | 19.61   | 1.981760562 | 0.005798082 | Hypothetical protein                                         | K16856 |
| <i>SMWW4_v1c05960</i> | 1278 | 6.28   | 20.77   | 1.809458899 | 0.010083535 | Mandelate racemase/muconate lactonizing protein              | K18334 |
| <i>SMWW4_v1c06050</i> | 1080 | 8.04   | 31.56   | 2.057760184 | 0.003484959 | Diguanylate cyclase                                          | -      |
| <i>SMWW4_v1c07960</i> | 1431 | 7.96   | 19.32   | 1.36424545  | 0.047544446 | Uroporphyrin-III C-methyltransferase                         | K02302 |

|                       |      |        |         |             |             |                                                            |        |
|-----------------------|------|--------|---------|-------------|-------------|------------------------------------------------------------|--------|
| <i>SMWW4_v1c09380</i> | 405  | 33.23  | 95.82   | 1.613534545 | 0.018821985 | Entry exclusion protein 2                                  | -      |
| <i>SMWW4_v1c09590</i> | 453  | 5.03   | 13.54   | 1.509150281 | 0.047647683 | Thiol-disulfide oxidoreductase DCC                         | -      |
| <i>SMWW4_v1c09630</i> | 804  | 18.09  | 45.14   | 1.405179799 | 0.039711158 | XRE family transcriptional regulator                       | -      |
| <i>SMWW4_v1c14030</i> | 570  | 0      | 1.94    | 6.46403802  | 0.006149306 | D-amino acid aminotransferase                              | -      |
| <i>SMWW4_v1c14570</i> | 1305 | 44.41  | 183.75  | 2.135063453 | 0.001796588 | Methyl-accepting chemotaxis transducer/sensory box protein | K03406 |
| <i>SMWW4_v1c14880</i> | 612  | 1.06   | 4.27    | 2.069193026 | 0.028123146 | Thiosulfate reductase cytochrome subunit B                 | -      |
| <i>SMWW4_v1c15130</i> | 498  | 0.44   | 3.43    | 2.987599272 | 0.012766938 | Cell division protein ZipA                                 | -      |
| <i>SMWW4_v1c15760</i> | 1947 | 837.07 | 2588.93 | 1.715457701 | 0.010633868 | Surface layer protein                                      | -      |
| <i>SMWW4_v1c16110</i> | 1146 | 89.97  | 238.28  | 1.491607242 | 0.025865665 | Cystathionine gamma-synthase                               | K01758 |
| <i>SMWW4_v1c18240</i> | 435  | 0.5    | 3.24    | 2.709764564 | 0.029588432 | Hypothetical protein                                       | -      |
| <i>SMWW4_v1c18740</i> | 366  | 1.19   | 5.49    | 2.26320099  | 0.029323086 | Alpha/beta hydrolase                                       | -      |
| <i>SMWW4_v1c19630</i> | 219  | 0      | 10.56   | 7.519616802 | 0.000125561 | Hypothetical protein                                       | -      |
| <i>SMWW4_v1c19920</i> | 750  | 0      | 1.07    | 6.010721672 | 0.021900161 | Gram-negative pili assembly chaperone                      | -      |
| <i>SMWW4_v1c19930</i> | 1341 | 0      | 0.75    | 6.328167771 | 0.009223959 | Hypothetical protein                                       | -      |
| <i>SMWW4_v1c20390</i> | 555  | 0.2    | 3.26    | 3.987630815 | 0.003042849 | S-type pyocin domain-containing protein                    | -      |
| <i>SMWW4_v1c21100</i> | 1620 | 183.43 | 791.92  | 2.196627397 | 0.001292975 | Phosphoenolpyruvate carboxykinase                          | K01610 |
| <i>SMWW4_v1c21110</i> | 1344 | 22.45  | 277.61  | 3.714301489 | 3.71E-07    | Citrate carrier protein                                    | K11616 |
| <i>SMWW4_v1c21220</i> | 765  | 52.77  | 126.04  | 1.342181562 | 0.045553947 | Putative chaperone protein                                 | -      |
| <i>SMWW4_v1c21230</i> | 555  | 34.61  | 99.09   | 1.603358212 | 0.018341349 | Spore coat U domain-containing protein                     | -      |
| <i>SMWW4_v1c21240</i> | 459  | 57.93  | 141.94  | 1.379007292 | 0.04099466  | Spore coat U domain protein                                | -      |
| <i>SMWW4_v1c22860</i> | 1155 | 0.75   | 2.96    | 2.046860068 | 0.020165681 | Beta-lactamase                                             | -      |
| <i>SMWW4_v1c25010</i> | 816  | 1.2    | 5.67    | 2.31409184  | 0.006447493 | Alpha/beta hydrolase                                       | -      |
| <i>SMWW4_v1c25080</i> | 93   | 2.33   | 14.05   | 2.603839127 | 0.039696281 | Hypothetical protein                                       | -      |
| <i>SMWW4_v1c25960</i> | 249  | 2.62   | 11.31   | 2.175611044 | 0.01990983  | Hypothetical protein                                       | -      |

|                       |      |        |         |             |             |                                           |        |
|-----------------------|------|--------|---------|-------------|-------------|-------------------------------------------|--------|
| <i>SMWW4_v1c26990</i> | 555  | 15.45  | 61.41   | 2.075879276 | 0.003234492 | Hypothetical protein                      | -      |
| <i>SMWW4_v1c27020</i> | 1506 | 12.83  | 82.65   | 2.773449081 | 8.36E-05    | Sugar ABC transporter ATP-binding protein | K17207 |
| <i>SMWW4_v1c27030</i> | 1038 | 13.07  | 60.25   | 2.290093156 | 0.001038141 | Sugar ABC transporter permease            | K17206 |
| <i>SMWW4_v1c27040</i> | 1008 | 39.08  | 184.63  | 2.326113537 | 0.000750124 | Sugar ABC transporter periplasmic protein | K17205 |
| <i>SMWW4_v1c28020</i> | 405  | 0.54   | 3.48    | 2.709764564 | 0.029588432 | Hypothetical protein                      | -      |
| <i>SMWW4_v1c29060</i> | 672  | 6.3    | 23.34   | 1.972830863 | 0.006192488 | ABC transporter-like protein              | K02032 |
| <i>SMWW4_v1c29070</i> | 843  | 10.17  | 31.61   | 1.720736071 | 0.013998183 | ABC transporter-like protein              | K02031 |
| <i>SMWW4_v1c29100</i> | 1569 | 46     | 187.11  | 2.110579955 | 0.002007458 | ABC transporter periplasmic protein       | K02035 |
| <i>SMWW4_v1c29800</i> | 405  | 10.99  | 95.82   | 3.20726482  | 1.44E-05    | Hypothetical protein                      | -      |
| <i>SMWW4_v1c30870</i> | 90   | 0      | 14.52   | 6.702529772 | 0.002863891 | Hypothetical protein                      | -      |
| <i>SMWW4_v1c31740</i> | 768  | 0.71   | 4.19    | 2.624652974 | 0.005619692 | ABC transporter                           | K15599 |
| <i>SMWW4_v1c32210</i> | 3090 | 10.89  | 96.9    | 3.239732351 | 6.06E-06    | Beta-D-galactosidase                      | K01190 |
| <i>SMWW4_v1c33380</i> | 309  | 450.97 | 5410.69 | 3.671100444 | 4.25E-07    | Hypothetical protein                      | -      |
| <i>SMWW4_v1c33680</i> | 468  | 1.86   | 7.95    | 2.168418532 | 0.01320914  | TetR family transcriptional regulator     | -      |
| <i>SMWW4_v1c34300</i> | 282  | 0.77   | 246.36  | 8.322285499 | 1.50E-15    | PTS family sugar porter component IIB     | K02822 |
| <i>SMWW4_v1c34320</i> | 1020 | 15.11  | 83.39   | 2.549967155 | 0.000281616 | Purine operon repressor                   | -      |
| <i>SMWW4_v1c35180</i> | 96   | 0      | 16.76   | 6.999490466 | 0.001006409 | Hypothetical protein                      | -      |
| <i>SMWW4_v1c35460</i> | 780  | 1.95   | 6.19    | 1.744916129 | 0.029826037 | Alpha-acetolactate decarboxylase          | K01575 |
| <i>SMWW4_v1c35510</i> | 468  | 51.25  | 287.87  | 2.575685839 | 0.000231096 | Hypothetical protein                      | -      |
| <i>SMWW4_v1c36450</i> | 1638 | 0.27   | 2.82    | 3.459719534 | 0.000295197 | Hypothetical protein                      | -      |
| <i>SMWW4_v1c37810</i> | 756  | 92.02  | 840.37  | 3.277294275 | 4.51E-06    | Ankyrin                                   | -      |
| <i>SMWW4_v1c37820</i> | 960  | 150.47 | 1236.66 | 3.125307671 | 1.03E-05    | Phospholipase                             | -      |
| <i>SMWW4_v1c38400</i> | 381  | 0      | 3.17    | 6.588206425 | 0.004165659 | Putative cytoplasmic protein              | -      |
| <i>SMWW4_v1c38530</i> | 1356 | 12.65  | 53.16   | 2.157415084 | 0.001822705 | Citrate carrier protein                   | -      |

|                       |      |        |        |             |             |                                                          |        |
|-----------------------|------|--------|--------|-------------|-------------|----------------------------------------------------------|--------|
| <i>SMWW4_v1c38880</i> | 2139 | 3.25   | 14.52  | 2.245503956 | 0.001667577 | Lysine decarboxylase                                     | K01582 |
| <i>SMWW4_v1c39550</i> | 303  | 0.72   | 9.95   | 3.802419114 | 0.000608346 | XRE family transcriptional regulator                     | -      |
| <i>SMWW4_v1c40650</i> | 1641 | 8.13   | 152.25 | 4.311379937 | 1.15E-08    | Acetolactate synthase                                    | K01652 |
| <i>SMWW4_v1c40660</i> | 1470 | 12.77  | 199.37 | 4.049925347 | 5.19E-08    | Aldehyde dehydrogenase                                   | K00130 |
| <i>SMWW4_v1c40670</i> | 795  | 3.14   | 62.22  | 4.387811248 | 2.67E-08    | L-aspartate dehydrogenase                                | K06989 |
| <i>SMWW4_v1c40680</i> | 795  | 2.87   | 64.25  | 4.564477896 | 1.02E-08    | Short-chain dehydrogenase                                | -      |
| <i>SMWW4_v1c40690</i> | 819  | 6.23   | 89.49  | 3.927879678 | 1.97E-07    | Putative alpha/beta hydrolase                            | -      |
| <i>SMWW4_v1c40700</i> | 525  | 7.44   | 155.5  | 4.466919726 | 9.13E-09    | Cupin                                                    | -      |
| <i>SMWW4_v1c40710</i> | 1257 | 3.8    | 16.16  | 2.171865074 | 0.002528126 | Major facilitator superfamily transporter                | -      |
| <i>SMWW4_v1c40730</i> | 942  | 11.52  | 27.96  | 1.364717697 | 0.048032886 | Glyoxalase/bleomycin resistance protein/dioxygenase      | -      |
| <i>SMWW4_v1c40780</i> | 318  | 0.68   | 13.6   | 4.319967473 | 5.78E-05    | Rieske (2Fe-2S) domain-containing protein                | -      |
| <i>SMWW4_v1c42100</i> | 1524 | 9.33   | 27.97  | 1.669806066 | 0.014934254 | Alkaline phosphatase                                     | K01077 |
| <i>SMWW4_v1c43430</i> | 777  | 4.75   | 13.46  | 1.585717802 | 0.029686015 | Permease                                                 | -      |
| <i>SMWW4_v1c43450</i> | 366  | 1.19   | 6.04   | 2.399882993 | 0.019112419 | Transcriptional regulator                                | -      |
| <i>SMWW4_v1c43810</i> | 1068 | 266.95 | 720.45 | 1.518809367 | 0.023078189 | Hypothetical protein                                     | -      |
| <i>SMWW4_v1c43830</i> | 2232 | 112.81 | 289.87 | 1.448010999 | 0.030017945 | Hypothetical protein                                     | -      |
| <i>SMWW4_v1c43840</i> | 1206 | 70.46  | 274.78 | 2.049703283 | 0.002607293 | Permease                                                 | -      |
| <i>SMWW4_v1c44490</i> | 1680 | 19.7   | 101.86 | 2.456114923 | 0.000407683 | Hemolysin activator HlyB domain-containing protein       | K11017 |
| <i>SMWW4_v1c44500</i> | 4824 | 17.57  | 151.62 | 3.195593292 | 7.12E-06    | Filamentous hemagglutinin outer membrane protein         | K11016 |
| <i>SMWW4_v1c44730</i> | 1122 | 1.35   | 4.21   | 1.714622861 | 0.032991148 | Hypothetical protein                                     | -      |
| <i>SMWW4_v1c46340</i> | 1239 | 4.91   | 48.04  | 3.375459774 | 4.50E-06    | Virulence factor                                         | -      |
| <i>SMWW4_v1c46350</i> | 2949 | 4.75   | 58.03  | 3.696753596 | 4.94E-07    | Virulence protein SrfB                                   | -      |
| <i>SMWW4_v1c46360</i> | 2190 | 6.69   | 80.57  | 3.675463584 | 5.50E-07    | Putative virulence factor                                | -      |
| <i>SMWW4_v1c46520</i> | 987  | 46.73  | 135.58 | 1.622936147 | 0.016280328 | Carbohydrate ABC transporter periplasmic-binding protein | -      |

|                       |      |        |         |             |             |                                                               |        |
|-----------------------|------|--------|---------|-------------|-------------|---------------------------------------------------------------|--------|
| <i>SMWW4_v1c46570</i> | 600  | 13.75  | 52.62   | 2.021165259 | 0.004185292 | Sugar isomerase (SIS)                                         | -      |
| <i>SMWW4_v1c47610</i> | 978  | 2.11   | 8.53    | 2.096162672 | 0.006550552 | Glycosyl transferase, group 2 family protein                  | -      |
| <i>SMWW4_v1c48010</i> | 123  | 8.82   | 31.88   | 1.926597925 | 0.022886106 | Hypothetical protein                                          | -      |
| <i>SMWW4_v1r120</i>   | 1530 | 0      | 0.79    | 6.588206425 | 0.004165659 | 16S ribosomal RNA                                             | K01977 |
| <i>SMWW4_v1t280</i>   | 77   | 22.55  | 62.68   | 1.553854798 | 0.04970526  | tRNA-Arg                                                      | K14219 |
| <i>SMWW4_v1t370</i>   | 75   | 1.45   | 13.41   | 3.147636445 | 0.039970491 | tRNA-Gln                                                      | K14223 |
| <i>SMWW4_v1t440</i>   | 76   | 11.42  | 44.98   | 2.046860068 | 0.020165681 | tRNA-Gly                                                      | K14225 |
| <i>ssuE</i>           | 579  | 0      | 1.91    | 6.46403802  | 0.006149306 | NAD(P)H-dependent FMN reductase                               | K00299 |
| <i>tap</i>            | 1626 | 405.68 | 1007.58 | 1.398986995 | 0.035652998 | Methyl-accepting protein IV                                   | K05877 |
| <i>tauC</i>           | 837  | 0.91   | 4.44    | 2.35792198  | 0.008158301 | Taurine ABC transporter permease                              | K15552 |
| <i>tauD</i>           | 849  | 1.53   | 10.66   | 2.870326025 | 0.000390157 | Taurine dioxygenase, 2-oxoglutarate-dependent                 | K03119 |
| <i>tsr</i>            | 1671 | 216.6  | 512.88  | 1.330056025 | 0.045524428 | Methyl-accepting chemotaxis protein I, serine sensor receptor | K05874 |
| <i>ulaA</i>           | 1380 | 51.9   | 2005.73 | 5.358374908 | 9.47E-12    | L-ascorbate-specific enzyme IIC component of PTS              | K03475 |
| <i>ulaC</i>           | 444  | 11.98  | 891.51  | 6.300816391 | 3.93E-14    | L-ascorbate-specific enzyme IIA component of PTS              | K02821 |
| <i>urtB</i>           | 1581 | 0      | 0.64    | 6.328167771 | 0.009223959 | Urea ABC transporter, permease protein UrtB                   | K11960 |
| <i>xylB</i>           | 1518 | 25.17  | 135.58  | 2.515689067 | 0.000295631 | Xylulokinase                                                  | K00854 |
| <i>ydjJ</i>           | 1035 | 121.01 | 690.19  | 2.598306531 | 0.000179671 | Putative Zn-dependent and NAD(P)-binding oxidoreductase       | K05351 |
| <i>yhdT</i>           | 243  | 6.25   | 21.93   | 1.887517621 | 0.01821108  | Inner membrane protein                                        | -      |
| <i>yhjH</i>           | 792  | 72.08  | 237.01  | 1.803589114 | 0.007697076 | Cyclic-di-GMP phosphodiesterase, FlhDC-regulated              | -      |
| <i>yjcH</i>           | 312  | 20.18  | 67.03   | 1.816496724 | 0.009977559 | Inner membrane protein, DUF485 family                         | -      |
| <i>yjdL</i>           | 1452 | 0.3    | 1.59    | 2.463656002 | 0.015514096 | Putative dipeptide and tripeptide permease                    | -      |
| <i>ykgB</i>           | 465  | 0      | 1.51    | 5.821269516 | 0.034782609 | Inner membrane protein, DUF417 family                         | -      |



116 **Table S5. Genes significantly downregulated in the *rcsB* mutant relative to the wild-type strain of *S. marcescens***

| <b>Gene Name</b> | <b>Gene sizes (bp)</b> | <b>JNB5-1_FPKM</b> | <b>SK68_FP KM</b> | <b>log<sub>2</sub>FC (SK68 vs JNB5-1)</b> | <b>P-Value</b> | <b>Product</b>                                             | <b>KEGG</b> |
|------------------|------------------------|--------------------|-------------------|-------------------------------------------|----------------|------------------------------------------------------------|-------------|
| <i>cadC1</i>     | 438                    | 21.31              | 6.43              | -1.638264464                              | 0.02893868     | Transcriptional regulator CadC                             | -           |
| <i>caiD</i>      | 720                    | 2.26               | 0.42              | -2.298189371                              | 0.049335813    | Carnitiny-CoA dehydratase                                  | K01692      |
| <i>cynT</i>      | 654                    | 10.45              | 2.92              | -1.746406096                              | 0.025029639    | Carbonic anhydrase                                         | K01673      |
| <i>nemA</i>      | 1104                   | 186.98             | 69.85             | -1.333831267                              | 0.045833215    | FMN-linked N-ethylmaleimide reductase                      | K10680      |
| <i>paaA</i>      | 939                    | 70.16              | 9.42              | -2.80810654                               | 8.49E-05       | Phenylacetate-CoA oxygenase subunit PaaA                   | K02609      |
| <i>paaB</i>      | 288                    | 27.13              | 1.4               | -4.151408434                              | 1.09E-05       | Phenylacetate-CoA oxygenase subunit PaaB                   | K02610      |
| <i>paaC</i>      | 1533                   | 34.76              | 12.07             | -1.43914916                               | 0.033713497    | 3-hydroxy-acyl-CoA dehydrogenase                           | K00074      |
| <i>paaD</i>      | 441                    | 43.81              | 6.38              | -2.686659399                              | 0.00035573     | Phenylacetic acid degradation protein PaaD                 | K02614      |
| <i>paaF</i>      | 774                    | 23.42              | 3.9               | -2.495591756                              | 0.000835449    | Enoyl-CoA hydratase/isomerase                              | K01692      |
| <i>paaG</i>      | 792                    | 40.29              | 12.95             | -1.549829261                              | 0.024849694    | Enoyl-CoA hydratase                                        | K15866      |
| <i>paaI</i>      | 759                    | 25.31              | 7.82              | -1.606649686                              | 0.022400251    | Phenylacetate-CoA oxygenase subunit PaaI                   | K02611      |
| <i>paaJ</i>      | 1206                   | 35.01              | 8.75              | -1.911865442                              | 0.005892683    | Beta-ketoadipyl CoA thiolase                               | K02615      |
| <i>paaJ2</i>     | 498                    | 14.6               | 1.41              | -3.259413293                              | 0.000189466    | Phenylacetate-CoA oxygenase subunit PaaJ                   | K02612      |
| <i>paaK2</i>     | 1059                   | 36.59              | 7.41              | -2.216305289                              | 0.00163565     | Phenylacetate-CoA oxygenase subunit PaaK                   | K02613      |
| <i>paaN</i>      | 2067                   | 30.72              | 9.24              | -1.645541775                              | 0.015566613    | Phenylacetic acid degradation protein PaaN                 | K02618      |
| <i>phnK</i>      | 789                    | 2.2                | 0                 | -7.023061828                              | 0.001006409    | Phosphonate transport system ATP-binding protein PhnK      | -           |
| <i>puuE</i>      | 1266                   | 272.52             | 33.83             | -2.923032701                              | 3.38E-05       | GABA aminotransferase, PLP-dependent                       | K00823      |
| <i>puuR</i>      | 558                    | 88.88              | 31.89             | -1.391564748                              | 0.040949264    | DNA-binding transcriptional repressor for the puu divergon | -           |
| <i>rcsB</i>      | 651                    | 822.88             | 2.47              | -8.281599096                              | 3.50E-19       | DNA-binding response regulator RcsB                        | K07687      |
| <i>rffH</i>      | 882                    | 0.86               | 0                 | -5.844608271                              | 0.034782609    | Glucose-1-phosphate thymidyltransferase                    | K00973      |

|                       |      |         |        |              |             |                                                                  |        |
|-----------------------|------|---------|--------|--------------|-------------|------------------------------------------------------------------|--------|
| <i>scsC</i>           | 717  | 12.56   | 3.93   | -1.587114199 | 0.034451952 | Suppressor for copper-sensitivity C                              | -      |
| <i>SMWW4_v1c00880</i> | 441  | 3.69    | 0.46   | -2.854359234 | 0.022208097 | Hypothetical protein                                             | -      |
| <i>SMWW4_v1c01470</i> | 1692 | 63.37   | 17.23  | -1.791767829 | 0.008514062 | Chitinase A                                                      | K01183 |
| <i>SMWW4_v1c02160</i> | 1464 | 1679.97 | 470.84 | -1.748573057 | 0.009305008 | Metalloprotease                                                  | K01406 |
| <i>SMWW4_v1c08030</i> | 771  | 10.84   | 2.09   | -2.281543612 | 0.003839201 | Amino acid-binding protein                                       | -      |
| <i>SMWW4_v1c10480</i> | 1041 | 69.95   | 17.48  | -1.91334091  | 0.005219833 | Pyridoxal-phosphate dependent enzyme                             | K01738 |
| <i>SMWW4_v1c11910</i> | 1443 | 148.92  | 30.94  | -2.180305234 | 0.001473592 | Chitinase C1                                                     | K01183 |
| <i>SMWW4_v1c12640</i> | 996  | 1.42    | 0.2    | -2.649726556 | 0.039696281 | ABC transporter substrate-binding protein                        | K02016 |
| <i>SMWW4_v1c12660</i> | 1026 | 2.43    | 0.1    | -4.383828647 | 0.000797167 | ABC transporter permease protein                                 | K02015 |
| <i>SMWW4_v1c13060</i> | 1032 | 1167.94 | 397.59 | -1.468071746 | 0.027799325 | Iron(III) transport system substrate-binding protein             | K02012 |
| <i>SMWW4_v1c13920</i> | 714  | 2.74    | 0      | -7.191753823 | 0.000530405 | GntR family transcriptional regulator                            | -      |
| <i>SMWW4_v1c14020</i> | 1236 | 3.95    | 0.81   | -2.179581003 | 0.011034893 | Monooxygenase FAD-binding protein                                | -      |
| <i>SMWW4_v1c14130</i> | 1131 | 239.51  | 68.01  | -1.729675788 | 0.010352973 | Oxidoreductase                                                   | -      |
| <i>SMWW4_v1c14710</i> | 981  | 11.51   | 3.69   | -1.550947155 | 0.034943366 | Nitrilase/cyanide hydratase and apolipoprotein N-acyltransferase | -      |
| <i>SMWW4_v1c16240</i> | 1389 | 0.63    | 0      | -6.03411172  | 0.021900161 | FKBP-type peptidyl-prolyl isomerase domain-containing protein    | -      |
| <i>SMWW4_v1c17610</i> | 801  | 86.99   | 14.43  | -2.503393313 | 0.00037907  | Extracellular endonuclease                                       | -      |
| <i>SMWW4_v1c18120</i> | 132  | 6.58    | 0      | -6.03411172  | 0.021900161 | Hypothetical protein                                             | -      |
| <i>SMWW4_v1c18870</i> | 537  | 245.55  | 20.41  | -3.500791855 | 1.67E-06    | Hypothetical protein                                             | -      |
| <i>SMWW4_v1c18990</i> | 747  | 3.05    | 0      | -7.412735803 | 0.00021796  | Amidohydrolase                                                   | -      |
| <i>SMWW4_v1c19750</i> | 1485 | 126     | 42.18  | -1.492023135 | 0.026216833 | ABC transporter-like protein                                     | K17215 |
| <i>SMWW4_v1c20330</i> | 1131 | 4.89    | 1.51   | -1.601564724 | 0.047493615 | Klebicin C phage associated protein                              | -      |
| <i>SMWW4_v1c22380</i> | 1845 | 707.64  | 213.94 | -1.639228629 | 0.01448166  | Extracellular lipase                                             | -      |
| <i>SMWW4_v1c22960</i> | 1797 | 340.8   | 79.06  | -2.021359415 | 0.00291792  | Glycoside hydrolase                                              | K01207 |
| <i>SMWW4_v1c23680</i> | 213  | 23.44   | 0      | -8.539371466 | 1.03E-06    | Hypothetical protein                                             | -      |

|                       |      |        |       |              |             |                                                    |        |
|-----------------------|------|--------|-------|--------------|-------------|----------------------------------------------------|--------|
| <i>SMWW4_v1c24900</i> | 642  | 6.76   | 1.72  | -1.874281115 | 0.028732664 | TetR family transcriptional regulator              | -      |
| <i>SMWW4_v1c25120</i> | 1503 | 15.81  | 4.15  | -1.842233075 | 0.008729496 | Ferric iron ABC transporter, permease protein      | K02011 |
| <i>SMWW4_v1c25200</i> | 903  | 2.4    | 0     | -7.342769752 | 0.000290613 | Putative alpha/beta hydrolase                      | -      |
| <i>SMWW4_v1c25800</i> | 1158 | 2.81   | 0.69  | -1.914045028 | 0.036252813 | Multidrug resistance protein D                     | -      |
| <i>SMWW4_v1c26220</i> | 2307 | 63.41  | 20.74 | -1.525293273 | 0.023350561 | Oxidoreductase alpha (molybdopterin) subunit       | -      |
| <i>SMWW4_v1c28430</i> | 237  | 25.19  | 3.39  | -2.785812889 | 0.001378134 | Hypothetical protein                               | -      |
| <i>SMWW4_v1c28820</i> | 1008 | 1.51   | 0.1   | -3.672585238 | 0.010215054 | Beta-ketoacyl-acyl-carrier-protein synthase I      | K00648 |
| <i>SMWW4_v1c28900</i> | 906  | 2.52   | 0.44  | -2.379810664 | 0.023630413 | Glycosyl transferase family protein                | -      |
| <i>SMWW4_v1c30350</i> | 1311 | 5.22   | 1.38  | -1.823880565 | 0.019867521 | Major facilitator superfamily transporter          | -      |
| <i>SMWW4_v1c30360</i> | 765  | 11.35  | 3.68  | -1.534083547 | 0.04110275  | Short chain dehydrogenase/reductase family protein | K00059 |
| <i>SMWW4_v1c30380</i> | 1350 | 141.41 | 24.06 | -2.468443791 | 0.000373896 | Colicin-like protein                               | -      |
| <i>SMWW4_v1c30820</i> | 1053 | 5.26   | 1.62  | -1.601564724 | 0.047493615 | NAD-dependent epimerase/dehydratase                | -      |
| <i>SMWW4_v1c31750</i> | 936  | 12.64  | 4.08  | -1.540875373 | 0.035428277 | NMT1/THI5-like domain-containing protein           | K15598 |
| <i>SMWW4_v1c33120</i> | 1329 | 154.5  | 55.53 | -1.389662465 | 0.037682998 | Glutamine synthetase                               | K09470 |
| <i>SMWW4_v1c33200</i> | 1101 | 18.14  | 3.1   | -2.455488513 | 0.00091773  | Diguanylate cyclase                                | -      |
| <i>SMWW4_v1c35030</i> | 972  | 9.04   | 2.07  | -2.034821226 | 0.008374124 | Hypothetical protein                               | -      |
| <i>SMWW4_v1c35350</i> | 411  | 39.34  | 3.67  | -3.325162486 | 2.99E-05    | Hypothetical protein                               | -      |
| <i>SMWW4_v1c35860</i> | 381  | 9.68   | 0.79  | -3.472137931 | 0.000814859 | Hypothetical protein                               | -      |
| <i>SMWW4_v1c35880</i> | 327  | 13.28  | 3.38  | -1.874281115 | 0.028732664 | Phage holin                                        | -      |
| <i>SMWW4_v1c37730</i> | 837  | 31.9   | 9.37  | -1.679265489 | 0.015853579 | Hypothetical protein                               | -      |
| <i>SMWW4_v1c37880</i> | 108  | 15.07  | 1.86  | -2.854359234 | 0.022208097 | Hypothetical protein                               | -      |
| <i>SMWW4_v1c38360</i> | 339  | 96.04  | 13.94 | -2.694718032 | 0.000227592 | Hypothetical protein                               | -      |
| <i>SMWW4_v1c38430</i> | 1431 | 0.68   | 0     | -6.201588493 | 0.014078675 | GntR family transcriptional regulator              | -      |
| <i>SMWW4_v1c38520</i> | 972  | 102.39 | 22.24 | -2.115690177 | 0.002113013 | Patatin                                            | -      |

|                       |      |         |        |              |             |                                                        |        |
|-----------------------|------|---------|--------|--------------|-------------|--------------------------------------------------------|--------|
| <i>SMWW4_v1c41490</i> | 483  | 8.54    | 0.21   | -5.10513788  | 3.23E-05    | Type VI secretion system effector                      | K11903 |
| <i>SMWW4_v1c41500</i> | 483  | 18.43   | 2.08   | -3.04349036  | 0.000252713 | Type VI secretion system effector                      | K11903 |
| <i>SMWW4_v1c41510</i> | 546  | 32.8    | 4.97   | -2.629555303 | 0.000484226 | Hypothetical protein                                   | -      |
| <i>SMWW4_v1c42460</i> | 1212 | 0.9     | 0      | -6.351630009 | 0.009223959 | Phage major capsid protein                             | -      |
| <i>SMWW4_v1c42680</i> | 1149 | 60.92   | 8.14   | -2.816075565 | 8.04E-05    | Aromatic amino acid permease                           | -      |
| <i>SMWW4_v1c42690</i> | 1455 | 137.39  | 12.37  | -3.386078766 | 2.91E-06    | Succinic semialdehyde dehydrogenase                    | K00135 |
| <i>SMWW4_v1c43610</i> | 345  | 197.24  | 68.48  | -1.439071916 | 0.033411576 | Hypothetical protein                                   | -      |
| <i>SMWW4_v1c43640</i> | 1683 | 22.18   | 4.18   | -2.318661957 | 0.001046084 | O-antigen polymerase                                   | -      |
| <i>SMWW4_v1c44200</i> | 219  | 562.96  | 192.82 | -1.458981699 | 0.030220457 | Phage shock protein G                                  | -      |
| <i>SMWW4_v1c45410</i> | 279  | 2.72    | 0      | -5.844608271 | 0.034782609 | Addiction module antitoxin                             | -      |
| <i>SMWW4_v1c46070</i> | 897  | 211.73  | 69.94  | -1.511303343 | 0.024423444 | Inosose dehydratase                                    | K03335 |
| <i>SMWW4_v1c46080</i> | 885  | 982.03  | 362.97 | -1.349346979 | 0.042588033 | Xylose isomerase domain-containing protein             | -      |
| <i>SMWW4_v1c46090</i> | 1014 | 1166.09 | 345.95 | -1.666500507 | 0.013006588 | Inositol 2-dehydrogenase                               | K00010 |
| <i>SMWW4_v1c46100</i> | 1941 | 795.71  | 193.31 | -1.954735509 | 0.003882767 | Thiamine pyrophosphate protein central region          | K03336 |
| <i>SMWW4_v1c46110</i> | 1932 | 763.35  | 149.51 | -2.265514781 | 0.000931697 | Ribokinase-like domain-containing protein              | K03338 |
| <i>SMWW4_v1c46150</i> | 822  | 368.63  | 83.3   | -2.059124837 | 0.002513992 | Myo-inositol catabolism IolB domain-containing protein | K03337 |
| <i>SMWW4_v1c46160</i> | 1506 | 797.1   | 140.53 | -2.417274989 | 0.00044546  | Methylmalonate-semialdehyde dehydrogenase              | K00140 |
| <i>SMWW4_v1c46230</i> | 414  | 8.65    | 0.73   | -3.429228026 | 0.000977184 | Hypothetical protein                                   | -      |
| <i>SMWW4_v1c46240</i> | 531  | 522.2   | 174.95 | -1.49098728  | 0.025944656 | Fimbrial protein                                       | -      |
| <i>SMWW4_v1c46250</i> | 552  | 34.21   | 7.1    | -2.177669731 | 0.002943482 | Fimbrial protein                                       | -      |
| <i>SMWW4_v1c46260</i> | 2502 | 11.84   | 3.3    | -1.757399999 | 0.011626696 | Fimbrial biogenesis outer membrane usher protein       | -      |
| <i>SMWW4_v1c46270</i> | 747  | 33.85   | 7.27   | -2.13045841  | 0.003005462 | Pili assembly chaperone                                | -      |
| <i>SMWW4_v1c46280</i> | 612  | 12.59   | 2.79   | -2.0779007   | 0.008149164 | Fimbrial protein                                       | -      |
| <i>SMWW4_v1c46290</i> | 1005 | 20.09   | 3      | -2.650936951 | 0.000384034 | Type I pilus assembly protein FimE                     | -      |

|                       |      |        |        |              |             |                                                              |        |
|-----------------------|------|--------|--------|--------------|-------------|--------------------------------------------------------------|--------|
| <i>SMWW4_v1c46300</i> | 540  | 10.65  | 3.17   | -1.656927816 | 0.039747057 | Fimbrial protein                                             | -      |
| <i>SMWW4_v1c46310</i> | 624  | 19.13  | 2.58   | -2.79542091  | 0.000390798 | LuxR family transcriptional regulator                        | -      |
| <i>SMWW4_v1c46330</i> | 918  | 9.69   | 2.63   | -1.790968414 | 0.018376695 | Hypothetical protein                                         | -      |
| <i>SMWW4_v1t340</i>   | 75   | 11.58  | 0      | -6.03411172  | 0.021900161 | tRNA-Gln                                                     | K14223 |
| <i>srlB</i>           | 363  | 92.68  | 33.24  | -1.392051761 | 0.042106722 | Glucitol/sorbitol-specific enzyme IIA component of PTS       | K02781 |
| <i>srlE</i>           | 981  | 31.75  | 9.43   | -1.663748555 | 0.016441846 | Glucitol/sorbitol-specific enzyme IIB component of PTS       | K02782 |
| <i>xylA</i>           | 837  | 477.03 | 112.91 | -1.992191723 | 0.003350782 | Xylose isomerase                                             | K06606 |
| <i>xylE</i>           | 1443 | 512.71 | 69.74  | -2.791295125 | 6.53E-05    | D-xylose transporter                                         | -      |
| <i>ycho</i>           | 1512 | 42.28  | 9.77   | -2.025274259 | 0.003416133 | Putative invasin                                             | -      |
| <i>ydcS</i>           | 1155 | 173.27 | 60.24  | -1.437584486 | 0.031772775 | Spermidine/putrescine ABC transporter solute-binding protein | K02055 |
| <i>yebE</i>           | 657  | 84.08  | 30.76  | -1.363672699 | 0.043817554 | Inner membrane protein, DUF533 family                        | -      |
| <i>yedA</i>           | 924  | 20.2   | 6.42   | -1.565338244 | 0.02602133  | Amino acid exporter for phenylalanine                        | -      |
| <i>yhdV</i>           | 222  | 24.93  | 7.7    | -1.601564724 | 0.047493615 | Putative outer membrane protein                              | -      |
| <i>ytfF</i>           | 969  | 151.42 | 42.96  | -1.730841153 | 0.010630564 | Inner membrane protein                                       | -      |

117

118

119

120

121

122
